# Effects of external stimulation on psychedelic state neurodynamics

Pedro A.M. Mediano<sup>a,1</sup>, Fernando E. Rosas<sup>b,c,d,1</sup>, Christopher Timmermann<sup>b</sup>, Leor Roseman<sup>b</sup>, David J. Nutt<sup>b</sup>, Amanda Feilding<sup>e</sup>, Mendel Kaelen<sup>f</sup>, Morten L. Kringelbach<sup>g,h</sup>, Adam B. Barrett<sup>i</sup>, Anil K. Seth<sup>j,k</sup>, Suresh Muthukumaraswamy<sup>1</sup>, Daniel Bor<sup>a</sup>, and Robin L. Carhart-Harris<sup>b</sup>

<sup>a</sup>Department of Psychology, University of Cambridge, Cambridge CB2 3EB; <sup>b</sup>Psychedelic Research Center, Department of Brain Science, Imperial College London, W12 0NN, UK; <sup>c</sup>Data Science Institute, Imperial College London, London SW7 2RH; <sup>d</sup>Center for Complexity Science, Imperial College London, London SW7 2RH; <sup>e</sup>The Beckley Foundation, Beckley Park, OX3 9SY, Oxford, United Kingdom; <sup>f</sup>Wavepaths, London E1 5JL, UK; <sup>g</sup>Department of Psychiatry, University of Oxford, Oxford OX3 7JX, UK; <sup>h</sup>Center for Music in the Brain, Department of Clinical Medicine, Aarhus University, DK-8000 Aarhus C, Denmark; <sup>i</sup>Sackler Center for Consciousness Science and Department of Informatics, University of Sussex, Brighton BN1 9RH, UK; <sup>j</sup>CIFAR Program on Brain, Mind, and Consciousness, Toronto M5G 1M1, Canada; <sup>k</sup>School of Pharmacy and Centre for Brain Research, Faculty of Medical and Health Sciences, The University of Auckland, Auckland, New Zealand

This manuscript was compiled on November 1, 2020

1 **Recent findings have shown that psychedelics reliably enhance**  
2 **brain entropy (understood as neural signal diversity), and this ef-**  
3 **fect has been associated with both acute and long-term psycho-**  
4 **logical outcomes such as personality changes. These findings are**  
5 **particularly intriguing given that a decrease of brain entropy is a**  
6 **robust indicator of loss of consciousness (e.g. from wakefulness**  
7 **to sleep). However, little is known about how context impacts the**  
8 **entropy-enhancing effect of psychedelics, which carries important**  
9 **implications for how it can be exploited in, for example, psychedelic**  
10 **psychotherapy. This article investigates how brain entropy is modu-**  
11 **lated by stimulus manipulation during a psychedelic experience, by**  
12 **studying participants under the effects of LSD or placebo, either with**  
13 **gross state changes (eyes closed vs. open) or different stimulus**  
14 **(no stimulus vs. music vs. video). Results show that while brain**  
15 **entropy increases with LSD in all the experimental conditions, it ex-**  
16 **hibits largest changes when subjects have their eyes closed. Fur-**  
17 **thermore, brain entropy changes are consistently associated with**  
18 **subjective ratings of the psychedelic experience, but this relation-**  
19 **ship is disrupted when participants are viewing video — potentially**  
20 **due to a “competition” between external stimuli and endogenous**  
21 **LSD-induced imagery. Taken together, our findings provide strong**  
22 **quantitative evidence for the role of context in modulating neural dy-**  
23 **namics during a psychedelic experience, underlining the importance**  
24 **of performing psychedelic psychotherapy in a suitable environment.**  
25 **Additionally, our findings put into question simplistic interpretations**  
26 **of brain entropy as a direct neural correlate of conscious level.**

Complexity | Psychedelics | Neuroscience | Consciousness

1 **P**sychedelic substances, such as LSD and psilocybin, are  
2 known to induce profound changes in subjects' perception,  
3 cognition, and conscious experience. In addition to their  
4 role in ancestral spiritual and religious practices, and their  
5 recreational use related to introspection and self-exploration,  
6 there is promising evidence that psychedelics can be used  
7 therapeutically to treat multiple mental health conditions (1–  
8 4). However, despite the increasingly available evidence of  
9 the neurochemical action of psychedelics at the neuronal and  
10 sub-neuronal level (5, 6), the mechanisms associated with their  
11 therapeutic efficacy are not yet completely understood.

12 Some of the factors at play during psychedelic therapy can  
13 be related to the Entropic Brain Hypothesis (EBH) (7, 8), a  
14 simple yet powerful theory which posits that the rich altered  
15 state of consciousness experienced under psychedelics depends  
16 on a parallel enriching effect on the dynamics of spontaneous

population-level neuronal activity.\* The hypothesis that in-  
creased brain entropy — as captured e.g. by Lempel-Ziv (LZ)  
complexity (8) — corresponds to states of enriched experi-  
ence has found empirical support in neuroimaging research  
on psychedelics (9, 10), as well as on other altered states, like  
meditation (11) and states of “flow” associated with musical  
improvisation (12). Furthermore, the therapeutic mechanisms  
of psychedelics are thought to depend on their acute entropy-  
enhancing effect, potentially reflecting a window of opportunity  
(and plasticity) mediating therapeutic change (13, 14). Con-  
versely, states such as deep sleep, general anaesthesia, and  
loss of consciousness have consistently shown reduced brain  
entropy (15–17).

The effectiveness of psychedelic therapy is thought to de-  
pend not only on direct neuropharmacological action, but  
also on contextual factors — commonly referred to as *set*  
*and setting*. These include the subject's mood, expectations,  
and broader psychological condition (set) prior to the “trip”,  
together with the sensorial, social, and cultural environment  
(setting) in which the drug is taken. For example, there is  
direct physiological evidence that (visual) stimuli affect the

\*Entropy is understood here not as a thermodynamic but as an informational property, measuring the complexity of neural dynamics and the diversity of their configuration repertoire (see Methods).

## Significance Statement

The effects of psychedelic substances on conscious experience can be substantially affected by contextual factors, which play a critical role in the outcomes of psychedelic therapy. This study shows how context can modulate not only psychological, but also neurophysiological phenomena during a psychedelic experience. Our findings reveal distinctive effects of having eyes closed after taking LSD, including a more pronounced change on the neural dynamics, and a closer correspondence between brain activity and subjective ratings. Furthermore, our results suggest a competition between external stimuli and internal psychedelic-induced imagery, which supports the practice of carrying out psychedelic therapy with patients having their eyes closed.

L.R., S.M., D.N., M.K. and R.C-H. conceptualised the experiment and collected the data. P.M., F.R. and R.C-H. designed the analysis, which was conducted by P.M. and F.R. All authors wrote the paper. P.M. and F.R. contributed equally to this paper.

The authors declare no conflict of interest.

<sup>1</sup>To whom correspondence should be addressed. E-mail: pam83@cam.ac.uk, f.rosas@ic.ac.uk

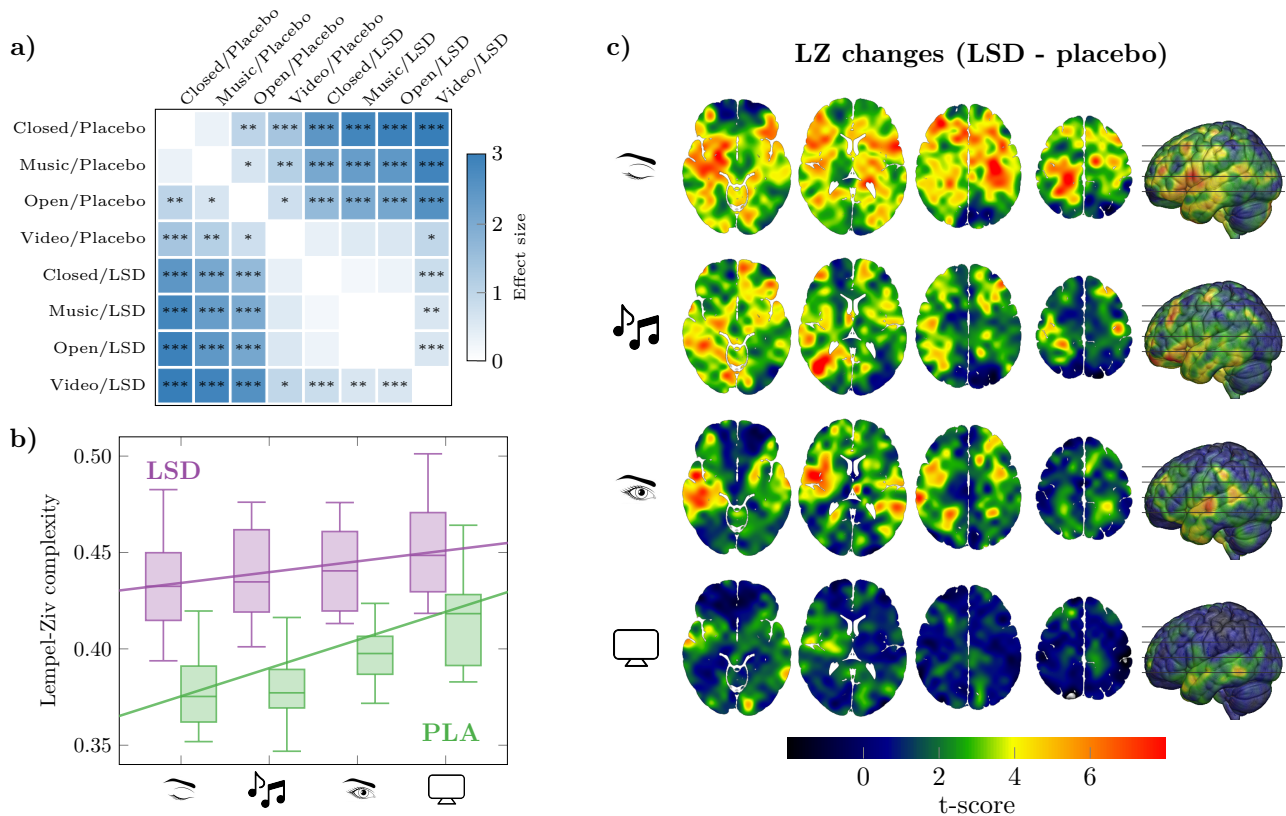

**Fig. 1. Stronger external stimulation increases baseline entropy, reduces drug effect.** **a)** The differences in average LZ, as measured by post-hoc t-tests and effect sizes (Cohen's  $d$ ), increase with stimulus and drug (\*:  $p < 0.05$ , \*\*:  $p < 0.01$ , \*\*\*:  $p < 0.001$ ). **b)** However, stronger external stimulation (i.e. with higher baseline LZ) reduces the differential effect of LSD on brain entropy vs. placebo. Linear mixed-effects models fitted with LZ complexity as outcome show a significant negative drug  $\times$  condition interaction ( $p < 0.01$ ; see Supplementary Material). **c)** T-scores for the effect of the drug in all four experimental conditions. In agreement with the LME models, the effect of the drug on increasing LZ substantially diminishes with eyes open or under external stimuli.

38 expression of serotonergic receptor genes (18), and that specific  
 39 music choices may either enhance or impede therapeutic  
 40 outcomes (19).

41 Despite its presumed importance, to our knowledge no  
 42 previous study has systematically assessed the influence of  
 43 set and setting on brain activity and subjective experience  
 44 during a psychedelic experience. This lack of relevant research,  
 45 combined with the fact that psychedelic therapy is almost  
 46 exclusively carried out with music listening and eyes closed,  
 47 exposes a knowledge gap that compromises key assumptions  
 48 of current psychedelic therapy practice. Here, we provide a  
 49 first step towards bridging this gap, presenting a systematic  
 50 investigation of how different environmental conditions can  
 51 modulate changes in brain entropy elicited by psychedelics in  
 52 healthy subjects. This work provides a proof of principle that  
 53 paves the way for future studies with clinical cohorts.

## 54 Results

55 **Increased LZ under external stimulation.** We use data presented by Carhart-Harris *et al.* (20), together with previously unpublished data from the same experiment. Twenty subjects participated in the study by attending two experimental sessions: one in which they received intravenous (i.v.) saline (placebo), and one in which they received i.v. LSD (75  $\mu$ g). The order of the sessions was randomised, separated by two

62 weeks, and participants were blind to the order (i.e. single  
 63 blind design). Whole-brain magnetoencephalography (MEG)  
 64 data were collected under four conditions: resting state with  
 65 eyes closed, listening to instrumental ambient music with eyes  
 66 closed, resting state with eyes open (focusing on a “fixation  
 67 dot”), and watching a silent nature documentary video —  
 68 henceforth referred to as *closed*, *music*, *open*, and *video*. The  
 69 music tracks were taken from the album “Eleusian Lullaby”  
 70 by Alio Die, and the video was composed of segments of the  
 71 “Frozen Planet” documentary series produced by the BBC.  
 72 More information about the experimental design can be found  
 73 in Ref. (20).

74 Studying the whole-brain average LZ from the placebo sessions showed that external stimuli yield significant differences in LZ (Kruskal-Wallis test,  $p < 0.001$ ). Post-hoc t-tests, shown in Figure 1a, revealed that richer stimuli induce consistent significant increases across conditions, with large effect sizes (Cohen's  $d$ ).

80 To disentangle the effect of the stimuli over the effect of eye opening, a linear mixed-effects (LME) model was constructed using the presence of stimulus and eye opening as predictor variables, and subject identity as random effect (see Methods). This model showed significant positive effects of both stimulus ( $\beta = 0.013$ , SE = 0.005,  $p = 0.017$ ) and eye opening ( $\beta = 0.025$ , SE = 0.005,  $p < 0.001$ ). The statistical significance of both effects suggests that the measured LZ cannot be explained

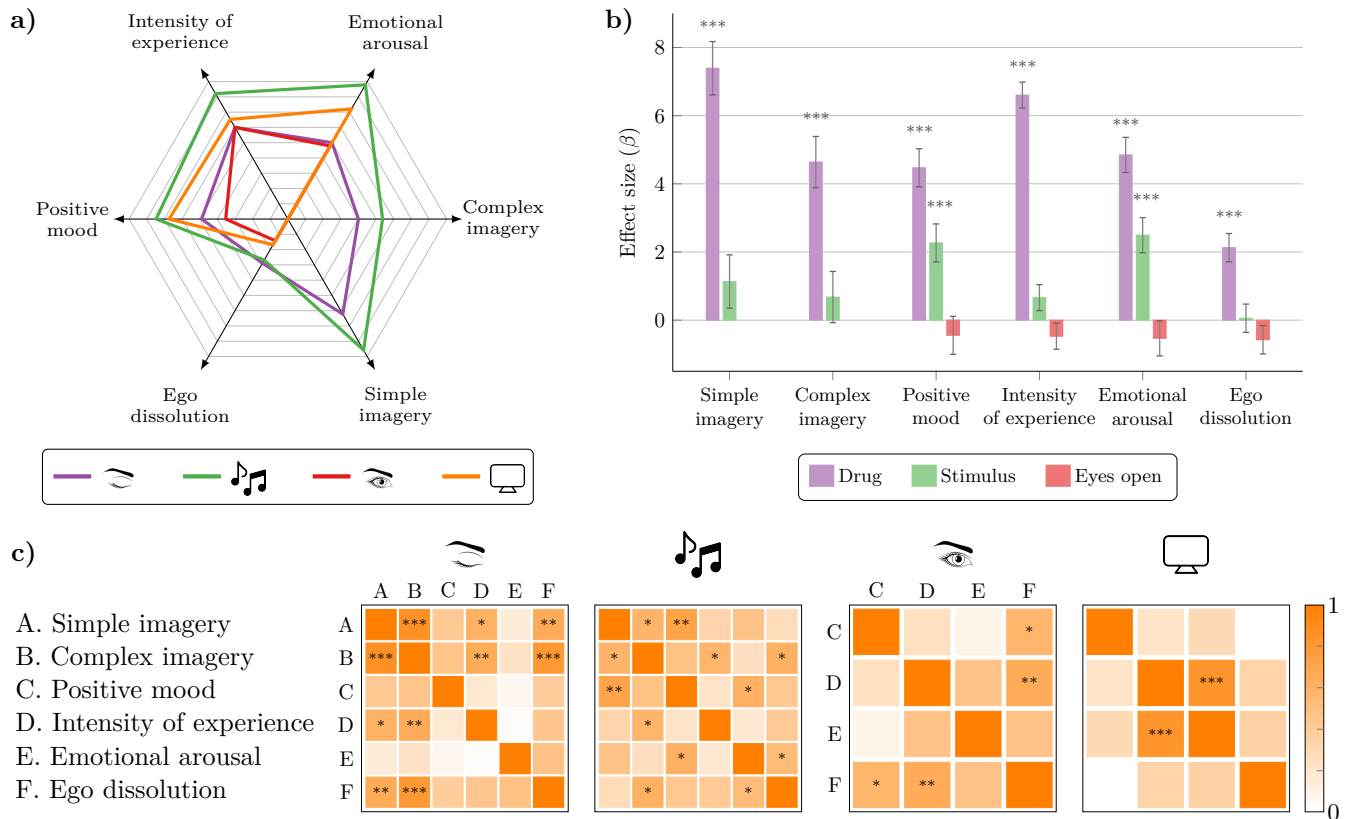

**Fig. 2. Setting affects participants' subjective reports of their psychedelic experience.** **a)** Average increases in VAS ratings between LSD and placebo show a varied profile across experimental conditions, suggesting that setting modulates participants' rating of their own experience. Simple and complex imagery data was not collected in the eyes open and video conditions. **b)** Effect sizes obtained from LME modelling confirm a strong effect from the drug in all items, as well as smaller and more specific effects from stimulus. **c)** Between-subjects correlation matrices between experience reports. (\*:  $p < 0.05$ , \*\*:  $p < 0.01$ , \*\*\*:  $p < 0.001$ )

**Table 1. Means ( $\beta$ ) and standard errors (SE) of coefficients of the LME model predicting whole-brain average LZ.**

|                                      | $\beta$ | SE    | $p$    |
|--------------------------------------|---------|-------|--------|
| <b>Drug</b>                          | 0.047   | 0.005 | <0.001 |
| <b>Stimulus</b>                      | 0.010   | 0.003 | 0.002  |
| <b>Eyes</b>                          | 0.025   | 0.005 | <0.001 |
| <b>Drug <math>\times</math> Eyes</b> | -0.016  | 0.006 | 0.011  |

88 merely by the presence or absence of visual stimuli, and must  
 89 be related to the structure of such stimuli (either music or  
 90 the video). Nonetheless, it is noteworthy that the simple act  
 91 of opening one's eyes has an especially marked (augmenting)  
 92 effect on brain entropy.

93 **Stronger external stimulus weakens drug effect.** To study the  
 94 effect of LSD on the whole-brain average LZ, we constructed  
 95 LME models similar to those in the previous section and  
 96 added the drug as fixed effect. This analysis shows a dramatic  
 97 increase in LZ under the effects of LSD, much larger than that  
 98 associated with eye opening or stimulus (Fig. 1b and Table 1).  
 99 Post-hoc analyses showed that the effect of drug is substantial  
 100 in all stimulus conditions (Fig. 1a).

101 Crucially, the LME model revealed a significant interaction  
 102 between drug and eye opening as predictors of LZ (Table 1).  
 103 Importantly, this interaction effect was negative — i.e. in-  
 104 creased external stimulation *reduced* the effect of the drug.  
 105 Alternatively, this can be interpreted as the drug reducing the

effect of external stimulation on brain entropy — which, 106  
 either way, points towards a “competition” between endogenous, 107  
 drug-induced, and exogenous, stimulus-induced, effects on neu- 108  
 ral dynamics (21). This negative interaction was confirmed by 109  
 ordering the four experimental conditions with integer values 110  
 from 1 to 4 (Fig. 1b), and with multiple statistical hypothesis 111  
 tests (e.g. 2-way ANOVA). Furthermore, we confirmed that 112  
 the results still hold with stricter filters (e.g. a low-pass filter 113  
 at 30 Hz on the MEG signals), and when controlling for order 114  
 effects between the stimulus and non-stimulus sessions (see 115  
 Supplementary Material). Both the effect of the drug and its 116  
 interaction with external conditions are spatially widespread 117  
 (Fig. 1c). 118

### Setting modulates subjective ratings and their relationships.

119 In addition to MEG measurements, Visual Analog Scale (VAS) 120  
 subjective ratings were collected at the end of each session. 121  
 The questionnaires were designed to capture central features 122  
 of the subjective effects of LSD. They included assessments 123  
 of the intensity of the experience, emotional arousal, ego 124  
 dissolution, positive mood, and simple and complex internal 125  
 visual imagery. The imagery items were only rated for the 126  
 eyes-closed conditions. 127

128 The effects of LSD on VAS ratings varied widely between 129  
 conditions (Fig. 2a). A quantitative analysis with LME models 130  
 showed the effect of the drug to be much larger than that of 131  
 the stimulus or eye opening on all the VAS measures (Fig. 2b). 132  
 Additionally, stimulus effects tended to be more specific than

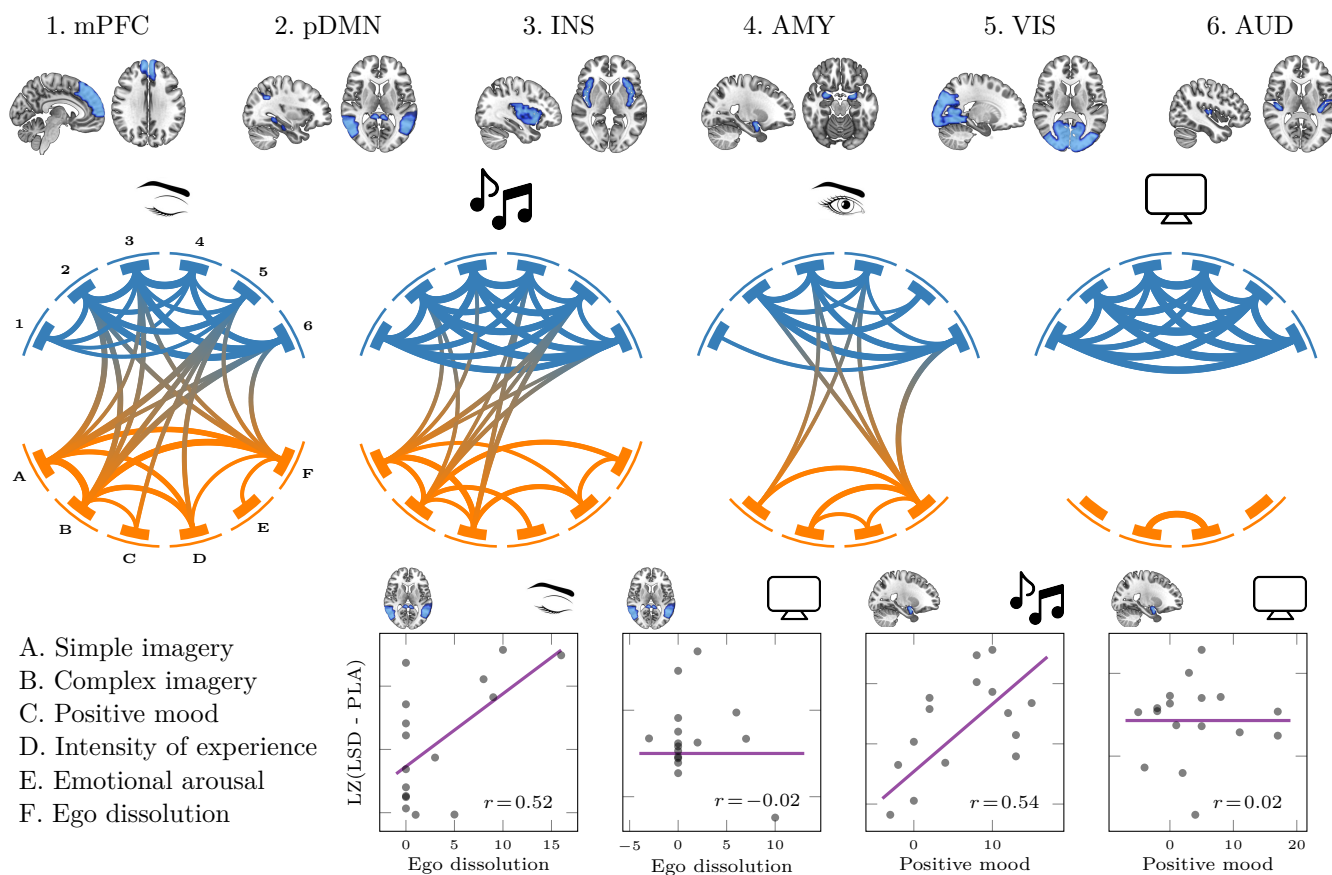

**Fig. 3. External stimulation alters the relationship between psychometric and neural effects of LSD.** Network representation of correlation matrices between brain entropy in six regions of interest (numbered 1-6, top), and subjective experience ratings (labelled A-F, bottom left), in all four experimental conditions. As external stimulation is increased, there is a large decrease in correlation between subjective ratings and entropy, but an increase in the correlation in entropy between different brain regions (see Supplementary Material). Bottom right panels show example correlations between ego dissolution and posterior DMN entropy (two left panels) and positive mood and amygdala entropy (two right panels). In both cases, correlation is strong and significant with eyes closed, but vanishes when subjects watch a video.

133 drug effects, reaching statistical significance only for positive  
134 mood and emotional arousal — in line with previous find-  
135 ings that carefully selected stimuli (e.g. music) can boost the  
136 affective state of subjects undergoing psychedelic psychother-  
137 apy (19, 22, 23). It is worth noting that these two are the  
138 least psychedelic-specific items.

139 Differences in setting not only affected subjects' VAS rat-  
140 ings, but also the relationship between the ratings themselves  
141 (Fig. 2c). For example, when resting with eyes closed, subjects  
142 tended to rate the intensity of their experience in agreement  
143 with the vividness of their simple and complex imagery — but,  
144 when watching a video, intensity was more strongly correlated  
145 with emotional arousal. These findings show that what sub-  
146 jects consider their intensity of experience can dramatically  
147 vary across various dimensions (24), confirming the assump-  
148 tion that the subjective quality and general intensity of a  
149 psychedelic experience strongly depends on the environmental  
150 conditions (or setting) in which it takes place.

151 **Neural-psychometric correlations can be disrupted by exter-**  
152 **nal stimuli.** A major aim of psychedelic neuroimaging is to  
153 discover specific relationships between brain activity and sub-  
154 jective experience. Examples include mappings between spe-  
155 cific neural dynamics and ratings of ego dissolution (25) or  
156 other specific aspects of experience such as its visual quality (9).

157 However, given that — as we show here — setting interacts  
158 with neural dynamics, then it is natural to ask whether it also  
159 affects the relationship between phenomenology and its neural  
160 correlates.

161 To address this question, we analysed the relationship be-  
162 tween LZ and VAS changes induced by LSD, in each one of  
163 the four experimental conditions. Between-subjects Pearson  
164 correlation coefficients were calculated between changes in  
165 VAS ratings and LZ measured in different regions of interest  
166 (ROI). Motivated by the nature of the study and known brain  
167 effects of LSD (20, 25), we focused on areas associated with  
168 sensory processing (visual and auditory), interoception (in-  
169 sula), emotional processing (amygdala), and self-monitoring  
170 (mPFC and posterior DMN; see Methods for details).

171 Analyses revealed multiple significant relationships between  
172 subjective ratings and LZ changes during the eyes-closed,  
173 music, and eyes-open conditions (Fig. 3). For example, we  
174 observed significant ( $p < 0.05$ , FDR-corrected) positive cor-  
175 relations between ego dissolution and DMN, positive mood and  
176 amygdala, and simple and complex imagery and visual and  
177 auditory ROIs, all in the eyes-closed condition — supporting  
178 the suitability of the eyes-closed resting condition for assess-  
179 ing the neural correlates of these experiences. Strikingly, all  
180 the observed neural-psychometric correlations vanish when sub-  
181 jects watched a video, with none exceeding an absolute value

of  $|r| > 1/10$ . This observation was verified by building a multivariate regression model, using the correlation coefficients between VAS and LZ changes as target variables, and stimuli and eye opening as predictors. Results showed that neither stimuli ( $p = 0.17$ ) nor eyes-open ( $p = 0.13$ ) had significant effects by themselves, but their interaction was strongly associated with smaller VAS-LZ correlation values ( $\beta = -0.21$ ,  $SE = 0.08$ ,  $p = 0.006$ ; see Supplementary Material).

As a complementary analysis, we also studied how the four environmental conditions affect the relationship between the LSD-induced LZ changes across different ROIs. To do this, we evaluated the Pearson correlation coefficient between the LZ changes measured in the various ROIs across subjects. It was observed that the correlation between ROIs is substantially increased when subjects perceive an external stimulus (either music or video; see Supplementary Material), which could be indicative of a form of “complexity matching” (26) in which neural dynamics are entrained by the external stimulus, obscuring the relationship between neurodynamics and subjective experience. This observation was also verified via multivariate regression modelling, this time using ROI-ROI correlation values as target. In this case, eye opening was associated with smaller correlation values ( $\beta = -0.10$ ,  $SE = 0.04$ ,  $p = 0.011$ ), while stimuli ( $\beta = 0.15$ ,  $SE = 0.04$ ,  $p < 0.001$ ) and the interaction between stimuli and eyes-open ( $\beta = 0.18$ ,  $SE = 0.05$ ,  $p = 0.001$ ) were both associated with significantly larger correlation values (see Supplementary Material). These findings suggest that the increased within-brain correlation driven by external stimulation may obfuscate potential correlations between entropy and individual VAS ratings — which are most apparent e.g. in the eyes closed condition.

**Conditional predictive analyses of subjective reports.** Finally, we analysed the relationship between changes in LZ and behavioural reports as they were exposed to the different experimental conditions. For this, we constructed LME models using VAS ratings as target; average LZ, eye opening, and stimulus as fixed effects; and subject identity as random effect (see Methods).

These models revealed multiple associations between brain entropy and subjective reports (Fig. 4), including some widespread correlations with LZ averaged across the whole brain (most strongly with ego dissolution and simple imagery), as well as more specific correlations (e.g. between positive mood and amygdala). In contrast, stimulus and eye opening show small effect sizes in all models, as well as strong negative interactions with LZ (see Supplementary Material). This negative interaction suggests that the relationship between LZ and VAS is broken when stimuli are present, in line with the results in Fig. 3.

To explore the correlations between behavioral ratings and LZ in various ROIs in more detail, we performed a conditional predictive power analysis (see Methods). This method allows us to build a directed network representing the predictive ability of the various ROIs with respect to a given VAS item, such that a ROI  $R_1$  is connected to a VAS item  $V$  via another ROI  $R_2$  if, once the entropy change in  $R_2$  is known, there is no further benefit in knowing the entropy change in  $R_1$  for improving the prediction of the change in  $V$  (Fig. 5a). Results show that, in general, “low-level” regions (i.e. closer to the sensory periphery, like visual areas) tend to “mediate” the associations between subjective reports and high-level

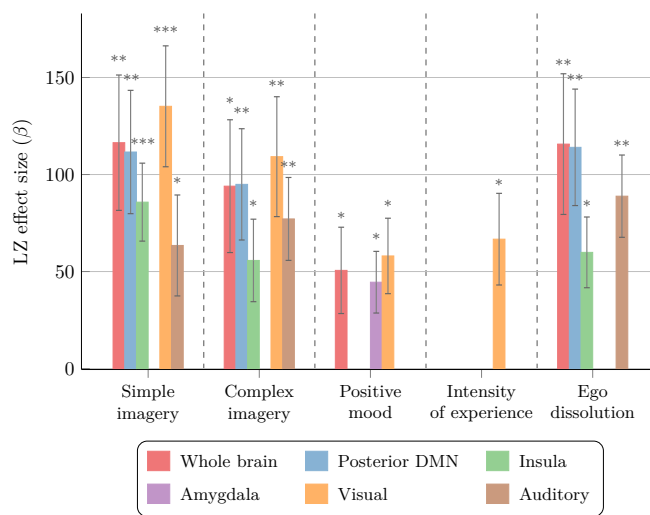

**Fig. 4. Changes in brain entropy predict changes in subjective reports.** Estimates, standard error, and FDR-corrected statistical significance (\*:  $p < 0.05$ , \*\*:  $p < 0.01$ , \*\*\*:  $p < 0.001$ ), of the effect of the LZ differences (LSD-PLA) for predicting VAS differences (LSD-PLA), obtained from LME models calculated over the four conditions.

regions (like the DMN). For example, visual and auditory areas mediate the predictive information that the pDMN and insula have about reported complex imagery.<sup>†</sup> Put simply: once the change in entropy in auditory and visual regions is known, knowing the change in entropy in the pDMN provides no extra information about the change in reported complex imagery. A notable exception, however, is ego dissolution, for which pDMN, auditory, and insula all provide unmediated complementary information — in line with previous studies linking self-related processing and the DMN (20).

We also performed a reciprocal analysis to assess the conditional predictive power of the various VAS items using LZ as target (Fig. 5b). Results show that, across brain regions and VAS items, the predictive power of more abstract VAS scores (e.g. ego dissolution, positive mood) tends to be mediated by less abstract ones (e.g. simple and complex imagery). For example, changes in ego dissolution scores become irrelevant for predicting LZ in auditory areas once one knows the corresponding change in complex imagery. One interpretation of these analyses is that brain entropy, as currently measured with LZ, may most faithfully reflect “low-level” aspects of the brain-mind relation (see Discussion).

## Discussion

The present study’s findings provide strong quantitative evidence on how environmental conditions can have a substantial influence on both subjective experience and on neural dynamics during a psychedelic experience. Importantly, the entropy-enhancing effects of LSD were less marked when participants opened their eyes or perceived external stimuli — such as music or video. Furthermore, the differences in brain entropy observed in various regions of the brain were found to be associated with behavioural reports about the subjects’ perception, emotion, and self-related processing — but the relationship

<sup>†</sup> Although note that the role of auditory regions and insula is reversed for simple and complex imagery, respectively.

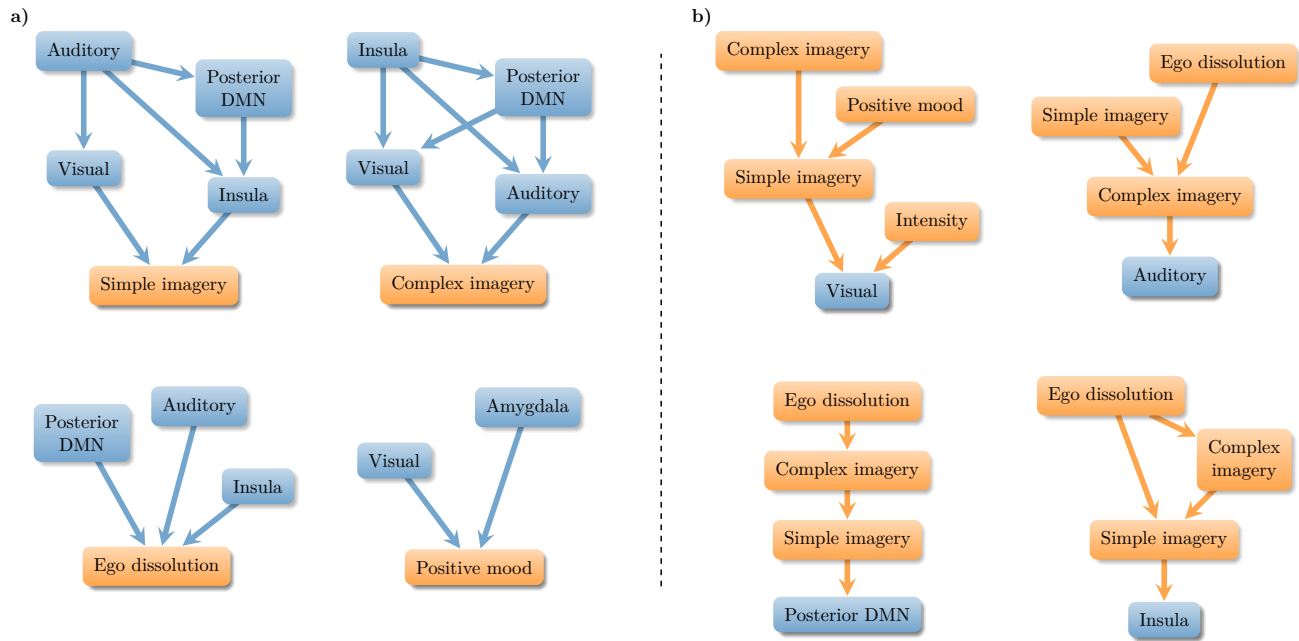

**Fig. 5. Statistical structure of brain entropy and subjective ratings data.** Networks represent conditional prediction diagrams (see Methods), in which node  $i$  is connected to node  $j$  if  $j$  “mediates” the statistical predictive information that  $i$  has about a target variable (bottom node in each network). **a)** Conditional predictive analysis from brain entropy to subjective experience reports; and **b)** from subjective reports to brain entropy.

276 between brain entropy and subjective reports collapsed in the  
277 video-watching condition.

278 **LZ as a robust correlate of subjective experience.** The increase in brain entropy — seen via LZ — is known to be  
279 a robust M/EEG biomarker associated with the psychedelic state (9, 10), and indeed, conscious states more generally (15–  
280 17, 27). In addition to replicating this effect on new data, we also observed other known effects of serotonergic psychedelics,  
281 including pronounced spectral power changes (in particular, LSD-induced alpha suppression (28)). Interestingly, the relationship  
282 between changes in these other metrics (like alpha power) and subjective ratings was substantially weaker than that of LZ (see Supplementary Material), suggesting that LZ  
283 is a particularly well-suited marker of psychedelic subjective experience.<sup>‡</sup>

284 Our results further put into question interpretations of LZ as a simple correlate of overall conscious level (e.g. (30)). In effect, subjects under LSD watching a video had the highest  
285 absolute brain entropy, but did not give maximal subjective ratings in any of the psychometric items. Furthermore, while a profound subjective experience such as ego dissolution was  
286 found to correlate with LZ changes, this effect was found most prominently in the eyes closed condition, and its predictive power was mediated by reported (simple and complex) visual  
287 imagery.

288 We propose two alternative interpretations of these findings. On the one hand, it could be that LZ most faithfully indexes brain activity associated with low-level sensory processing. This interpretation could be seen as consistent with  
289 recent reports showing that LZ is not affected by cognitive load (31). On the other hand, it could be that LZ shows strong

<sup>‡</sup>The relation between LZ and spectral changes can be disentangled with more elaborate statistical methods (29), although this analysis is beyond the scope of this paper.

287 associations with high-level cognitive processing or subjective phenomena (such as ego dissolution) in the eyes-closed conditions because that relationship becomes more specific in the eyes-open conditions — especially video. Future studies might distinguish between these hypotheses by exploring the reliability of relationships between LZ and various subjective phenomena, including ego dissolution, perceptual complexity, and alertness, involving different pharmacological agents (e.g. psychedelics and stimulants), dosages, and stimuli.

#### Towards a refinement of the entropic brain hypothesis.

288 A deeper understanding of the functional relevance of brain entropy will help us better understand how such measures can be refined, in order to shed clearer light on their relationship with reported phenomenology. The results presented in this paper, while grounded in and motivated by the EBH, also highlight some important qualifiers of it. Since brain entropy measures such as LZ depend only on the dynamics of individual loci (e.g., individual time series corresponding to single sources or sensors), they may only indirectly reflect the richer scope of brain dynamics, network and connectivity properties — although it is worth noting that LSD-induced entropy increases at the single-source level have been related to specific network properties of the human connectome (32).

289 One potential way forward for the EBH may be to consider the entropy of network dynamics and other high-order brain features, rather than merely the entropy of individual sources. For example, examining increases in entropy at the level of emergent whole-brain states may prove particularly fruitful (33). We see this as part of a broader move towards multidimensional descriptions of brain activity, transcending “one-size-fits-all” scalar measures — including more complicated unidimensional ones like integrated information (34, 35).

In line with recent theoretical proposals (36) and experimental findings (10), a range of metrics may be necessary to provide a more complete, multi-dimensional representation of brain states. However, we also acknowledge that increasing model complexity can complicate interpretability and affect statistical power, and thus is only justified when it yields substantial improvement in explanatory power and is driven by reliable hypotheses.

**Implications for psychedelic psychotherapy.** These findings can be regarded as neurobiological evidence for the importance of environmental context (37), or ‘setting,’ to the quality of psychedelic experiences — a matter of particular relevance to psychedelic therapy. In particular, the present findings support the principle that having one’s eyes closed during a psychedelic experience may enhance the differential entropic effect of the drug (1), which is consistent with approaches fostering eyes-closed, introspective experiences during psychedelic therapy, as they may lead to beneficial therapeutic outcomes (38). In addition, our results suggest a differential effect between sensory modalities (visual versus auditory) on brain dynamics and subjective experience, with visual stimulation reducing the measured relationship between neural entropic changes and subjective reports. Together, these findings support the choice of music — in contrast to visual stimulation — to modulate and support psychedelic therapy (19, 39, 40).

It remains possible that environments or stimuli different from the ones considered in this study could potentially lead to different results. Additionally, there are a number of phenomena relevant to the psychedelic experience for which having eyes open may be more conducive (e.g. feelings of communis, or acute connection with nature (41)), which cannot be assessed within the current experimental design. Furthermore, the observed disruption between psychological phenomena and brain dynamics was only assessed via LZ applied to MEG data, and might not be true for other neural signatures.

Importantly, this study reveals that the effects of contextual elements on brain dynamics can be effectively tracked via current neuroimaging techniques. Our results establish LZ as a marker that is sensitive to the interaction between drug and context, which opens the door to future studies that may assess the effect of contextual elements on the brain during psychedelic therapy. This study, therefore, serves as a proof-of-concept translational investigation in healthy subjects, setting a precedent for future studies in clinical populations. Accompanying extensions into clinical populations, future work is also needed to further clarify how interactions between drug and context manifest on a psychological and neurobiological level, and how they can be harnessed for best therapeutic outcomes.

## Materials and Methods

**Data pre-processing.** Data was collected with a 271-gradiometer CTF MEG scan. In addition, structural MRI scans of every subject were obtained for later inter-subject co-registration. Three subjects could not complete all stages of recording, or had excessive movement artefacts and were removed from the analysis altogether.

All pre-processing steps were performed using the FieldTrip toolbox (42). First, artefacts were removed by visual inspection and muscle and line noise effects were removed using ICA. Then we applied a 2<sup>nd</sup>-order lowpass Butterworth filter at 100 Hz and split the data into 2s epochs for subsequent analysis.

For source reconstruction, we used the centroids of the AAL-90 atlas (43). The positions of these centroids were non-linearly inverse-warped to subject-specific grids using the subjects’ structural MRI scans, and source time series (a.k.a. *virtual sensors*) were estimated with a regularised LCMV beamformer. We calculated Lempel-Ziv complexity on these locations, and finally mapped them back onto the standard template for statistical analysis and visualisation. In addition, for the visualisation in Fig. 1c we computed LZ in sources reconstructed in a uniform 10 mm 3D grid.

**Lempel-Ziv complexity.** The main tool of analysis used in this study is the Lempel-Ziv complexity (referred to as LZ), which estimates how diverse the patterns exhibited by a given signal are (44). The method was introduced by Abraham Lempel and Jacob Ziv to study the statistics of binary sequences (44), and was later extended (45, 46) to become the basis of the well-known “zip” compression algorithm. This algorithm has been used to study the diversity of patterns in EEG activity for more than 20 years, with some early studies focusing on epilepsy (47) and depth of anaesthesia (48).

LZ is calculated in two steps. First, the value of a given signal  $X$  of length  $T$  is binarised, calculating its mean value and turning each data point above it to “1”s and each point below it to “0”s. Then, the resulting binary sequence is scanned sequentially looking for distinct structures or “patterns.” Finally, the signal complexity is determined by the number of patterns found, denoted by  $C_{LZ}(X)$ . Regular signals can be characterized by a small number of patterns and hence have low  $C_{LZ}$ , while irregular signals contain many different patterns and hence have a high  $C_{LZ}$ .

Following the reasoning above, the LZ method identifies signal complexity with *richness of content* (49) — a signal is considered complex if it is not possible to provide a brief (i.e. compressed) representation of it. Accordingly, a popular way of understanding LZ is as a proxy for estimating the Kolmogorov complexity, the length of the shortest computer program that can reproduce a given pattern (50). However, we (and others) argue that this view is brittle in theory and of limited use in practice (51). A simpler and more direct interpretation of LZ is to focus on the quantity

$$c_{LZ}(X) := \frac{T}{\log(T)} C_{LZ}(X),$$

which is an efficient estimator of the entropy rate of  $X$  (52). The entropy rate measures how many bits of innovation are introduced by each new data sample (53), and is related with how hard it is to predict the next value of a sequence.<sup>§</sup> This makes this normalised LZ,  $c_{LZ}$ , a principled, data-efficient estimator of the diversity of the underlying neural process. For simplicity, the rest of the manuscript refers to  $c_{LZ}$  generically as LZ.

Unlike in previous studies, we do not apply a Hilbert transform, and instead apply the LZ procedure to the source-reconstructed, broadband signal. While there are certain interpretability advantages to using a Hilbert transform (for example, signal can be interpreted as the amplitude of an underlying neural oscillation), the Hilbert transform cannot be meaningfully applied to broadband signals, and pre-filtering the data would add further (undesired) degrees of freedom to our analysis. In practice, however, LZ is a remarkably robust measure and the same qualitative results hold under different pre-processing techniques. See Refs. (9, 15, 55) for further discussion.

In terms of algorithm, we follow the original procedure presented in Ref. (44) — commonly known as LZ76 — following the simplified algorithm described by Kaspar and Schuster (56). We note that although other versions of the LZ algorithm can also be employed to estimate the entropy rate (e.g. the common dictionary-based implementation (45, 46)), their computation time and convergence is slower than LZ76, making the latter a better choice for our experiments.

**Statistical modelling.** To explore the effect of external conditions in detail, disentangling the effect of stimuli versus an effect *beyond* merely opening one’s eyes, the following encoding was used for the four conditions:

<sup>§</sup>In effect, the mean entropy rate divided by two approximates the probability of making an error with the best informed guess about the next sample (54).

| Experimental conditions | Model variables |          |
|-------------------------|-----------------|----------|
|                         | Eyes open       | Stimulus |
| Eyes closed, no music   | 0               | 0        |
| Eyes closed, music      | 0               | 1        |
| Eyes open, no video     | 1               | 0        |
| Eyes open, video        | 1               | 1        |

The paper considers various linear mixed-effects (LME) models, in most cases with a measure of interest (VAS ratings or LZ complexity) as target; drug, stimulus and eyes open as fixed effects; and subject identity as random effect. When constructing a model, all possible pairwise interactions were considered; then model selection is performed using the Bayesian Information Criterion (BIC). All the reported models correspond to the one selected by BIC. All models were estimated via restricted maximum likelihood, using the open-source packages `lme4 v.1.1-21` (57) and `lmerTest v.3.1-1` (58) on R v.3.6.0.

**Brain regions of interest.** For the neural-psychometric correlation analysis in Fig. 3 onwards, we calculated the average LZ of several brain Regions of Interest (ROIs), each of them composed of a number of sub-regions represented in the AAL-90 atlas (43). For each subject, the mean LZ value of each ROI was obtained by averaging the LZ values of the source-reconstructed activity at the centroid of each sub-region.

For all the analyses, the following ROIs were considered: two sensory areas, two related to the DMN, one related to interoception and one to emotion. Specifically, the considered ROIs and their corresponding AAL-90 sub-regions are:

- Auditory: left and right Heschl areas;
- Visual: left and right Calcarine, bilateral Lingual, Cuneus, inferior, middle and superior occipital;
- Amygdala: both left and right;
- Insula: both left and right;
- mPFC: left and right medial superior frontal gyrus; and
- Posterior DMN: bilateral posterior and median cingulate gyrus, middle temporal gyrus, and angular gyrus.

**Conditional predictive power analyses.** The analyses of conditional predictive power were carried out according to the following procedure. Consider the case of studying the conditional predictive power of a given ROI  $R_1$  with respect to a particular subjective report  $V$ . We say that the predictive power from  $R_1$  to  $V$  is statistically mediated by another ROI  $R_2$  if (i) both  $R_1$  and  $R_2$  are significantly correlated with  $V$  according to their respective LME model (i.e. the FDR-corrected  $p$ -value of their estimated  $\beta$  is below 0.05); and (ii) when calculating a BIC-optimal LME model with  $V$  as target and both  $R_1$  and  $R_2$  as predictors, then the estimate of the effect of  $R_1$  loses significance (i.e. its  $p$ -value goes above 0.1, non-FDR-corrected). The diagrams in Figure 5a are built following this procedure in an iterative fashion, adding a link from  $R_1$  to  $R_2$  if and only if  $R_2$  mediates the predictive power of  $R_1$  about  $V$ , and a link from  $R_1$  to  $V$  if and only if it has unmediated predictive power about  $V$ . Figure 5b was obtained by an analogous procedure, where the roles of ROI and VAS were reversed.

**Ethics statement.** This study was approved by the National Research Ethics Service committee London-West London and was conducted in accordance with the revised declaration of Helsinki (2000), the International Committee on Harmonization Good Clinical Practice guidelines, and National Health Service Research Governance Framework. Imperial College London sponsored the research, which was conducted under a Home Office license for research with schedule 1 drugs.

**ACKNOWLEDGMENTS.** P.M. would like to thank Andrew Olson for discussion of the experimental results. P.M. and D.B. are funded by the Wellcome Trust (grant no. 210920/Z/18/Z). F.R. is supported by the Ad Astra Chandaria foundation. A.B. and A.S. are grateful to the Dr. Mortimer and Theresa Sackler Foundation,

which supports the Sackler Centre for Consciousness Science. The initial study and data collection was supported by the Beckley Foundation as part of the Beckley-Imperial research programme, and by supporters of the Wallace.com crowdfunding campaign.

- Carhart-Harris RL, et al. (2016) Psilocybin with psychological support for treatment-resistant depression: An open-label feasibility study. *The Lancet Psychiatry* 3(7):619–627.
- Nichols DE (2016) Psychedelics. *Pharmacological Reviews* 68(2):264–355.
- Carhart-Harris RL, Goodwin GM (2017) The therapeutic potential of psychedelic drugs: Past, present, and future. *Neuropsychopharmacology* 42(11):2105.
- Kyzar EJ, Nichols CD, Gainetdinov RR, Nichols DE, Kaluff AV (2017) Psychedelic drugs in biomedicine. *Trends in Pharmacological Sciences* 38(11):992–1005.
- Grasso C, Volsi GL, Barresi M (2016) Serotonin modifies the spontaneous spiking activity of gracile nucleus neurons in rats: Role of 5-HT1A and 5-HT2 receptors. *Archives Italiennes de Biologie* 154(2-3):39–49.
- Wacker D, et al. (2017) Crystal structure of an LSD-bound human serotonin receptor. *Cell* 168(3):377–389.
- Carhart-Harris RL, et al. (2014) The entropic brain: A theory of conscious states informed by neuroimaging research with psychedelic drugs. *Frontiers in Human Neuroscience* 8:20.
- Carhart-Harris RL (2018) The entropic brain – Revisited. *Neuropharmacology*.
- Schartner MM, Carhart-Harris RL, Barrett AB, Seth AK, Muthukumaraswamy SD (2017) Increased spontaneous MEG signal diversity for psychoactive doses of ketamine, LSD and psilocybin. *Scientific Reports* 7:46421.
- Timmermann C, et al. (2019) Neural correlates of the DMT experience assessed with multivariate EEG. *Scientific Reports* 9(1):1–13.
- Vivot RM, Pallavicini C, Zamberlan F, Vigo D, Tagliazucchi E (2020) Meditation increases the entropy of brain oscillatory activity. *Neuroscience* 431:40–51.
- Dolan D, et al. (2018) The improvisational state of mind: A multidisciplinary study of an improviser approach to classical music repertoire performance. *Frontiers in Psychology* 9:1341.
- Carhart-Harris RL, Friston K (2019) REBUS and the anarchic brain: Toward a unified model of the brain action of psychedelics. *Pharmacological Reviews* 71(3):316–344.
- Carhart-Harris RL (2019) How do psychedelics work? *Current Opinion in Psychiatry* 32(1):16–21.
- Schartner M, et al. (2015) Complexity of multi-dimensional spontaneous EEG decreases during propofol induced general anaesthesia. *PLoS One* 10(8):e0133532.
- Casali AG, et al. (2013) A theoretically based index of consciousness independent of sensory processing and behavior. *Science Translational Medicine* 5(198):198ra105.
- Ferenets R, et al. (2006) Comparison of entropy and complexity measures for the assessment of depth of sedation. *IEEE Transactions on Biomedical Engineering* 53(6):1067–1077.
- Watakabe A, et al. (2009) Enriched expression of serotonin 1B and 2A receptor genes in macaque visual cortex and their bidirectional modulatory effects on neuronal responses. *Cerebral Cortex* 19(8):1915–1928.
- Kaelen M, et al. (2018) The hidden therapist: Evidence for a central role of music in psychedelic therapy. *Psychopharmacology* 235(2):505–519.
- Carhart-Harris RL, et al. (2016) Neural correlates of the LSD experience revealed by multimodal neuroimaging. *Proceedings of the National Academy of Sciences* 113(17):4853–4858.
- de Araujo DB, et al. (2012) Seeing with the eyes shut: Neural basis of enhanced imagery following ayahuasca ingestion. *Human Brain Mapping* 33(11):2550–2560.
- Kaelen M, et al. (2015) LSD enhances the emotional response to music. *Psychopharmacology* 232(19):3607–3614.
- Preller KH, et al. (2017) The fabric of meaning and subjective effects in LSD-induced states depend on serotonin 2A receptor activation. *Current Biology* 27(3):451–457.
- Bayne T, Carter O (2018) Dimensions of consciousness and the psychedelic state. *Neuroscience of Consciousness* 2018(1):niy008.
- Tagliazucchi E, et al. (2016) Increased global functional connectivity correlates with LSD-induced ego dissolution. *Current Biology* 26(8):1043–1050.
- Carpentier SM, et al. (2020) Complexity matching: Brain signals mirror environment information patterns during music listening and reward. *Journal of Cognitive Neuroscience* 32(4):734–745.
- Schartner MM, et al. (2017) Global and local complexity of intracranial eeg decreases during nrem sleep. *Neuroscience of Consciousness* 2017(1):niw022.
- Muthukumaraswamy SD, et al. (2013) Broadband cortical desynchronization underlies the human psychedelic state. *Journal of Neuroscience* 33(38):15171–15183.
- Mediano PA, Rosas FE, Barrett AB, Bor D (2020) Decomposing spectral and phasic differences in non-linear features between datasets. *arXiv:2009.10015*.
- Mateos D, Erra RG, Wennberg R, Velazquez JP (2018) Measures of entropy and complexity in altered states of consciousness. *Cognitive Neurodynamics* 12(1):73–84.
- Nilsen AS, Juel BE, Storm JF (2019) Measures of states of consciousness during attentional and cognitive load. *bioRxiv* p. 586149.
- Herzog R, et al. (2020) A mechanistic model of the neural entropy increase elicited by psychedelic drugs. *bioRxiv*.
- Rosas FE, et al. (2020) Reconciling emergences: An information-theoretic approach to identify causal emergence in multivariate data. *arXiv:2004.08220*.
- Mediano PA, Seth AK, Barrett AB (2019) Measuring integrated information: Comparison of candidate measures in theory and simulation. *Entropy* 21(1).
- Mediano PA, Rosas F, Carhart-Harris RL, Seth AK, Barrett AB (2019) Beyond integrated information: A taxonomy of information dynamics phenomena. *arXiv:1909.02297*.
- Bayne T, Hohwy J, Owen AM (2016) Are there levels of consciousness? *Trends in Cognitive Sciences* 20(6):405–413.
- Carhart-Harris R, et al. (2018) Psychedelics and the essential importance of context. *Journal of Psychopharmacology* 32(7):725–731. PMID: 29446697.
- Johnson MW, Richards WA, Griffiths RR (2008) Human hallucinogen research: Guidelines for safety. *Journal of Psychopharmacology* 22(6):603–620.
- Bonny HL, Pahke WN (1972) The use of music in psychedelic (LSD) psychotherapy. *Journal*



- 599 *of Music Therapy.*
- 600 40. Barrett FS, Preller KH, Kaelen M (2018) Psychedelics and music: Neuroscience and thera-  
601 peutic implications. *International Review of Psychiatry* 30(4):350–362.
- 602 41. Kettner H, Gandy S, Haijen EC, Carhart-Harris RL (2019) From egoism to ecoism:  
603 Psychedelics increase nature relatedness in a state-mediated and context-dependent man-  
604 ner. *International Journal of Environmental Research and Public Health* 16(24):5147.
- 605 42. Oostenveld R, Fries P, Maris E, Schoffelen JM (2011) Fieldtrip: Open source software for  
606 advanced analysis of MEG, EEG, and invasive electrophysiological data. *Intell. Neuroscience*  
607 2011:1:1–1:9.
- 608 43. Tzourio-Mazoyer N, et al. (2002) Automated anatomical labeling of activations in SPM using  
609 a macroscopic anatomical parcellation of the MNI MRI single-subject brain. *NeuroImage*  
610 15(1):273–89.
- 611 44. Lempel A, Ziv J (1976) On the complexity of finite sequences. *IEEE Transactions on Informa-*  
612 *tion Theory* 22(1):75–81.
- 613 45. Ziv J, Lempel A (1977) A universal algorithm for sequential data compression. *IEEE Transac-*  
614 *tions on Information Theory* 23(3):337–343.
- 615 46. Ziv J, Lempel A (1978) Compression of individual sequences via variable-rate coding. *IEEE*  
616 *Transactions on Information Theory* 24(5):530–536.
- 617 47. Radhakrishnan N, Gangadhar B (1998) Estimating regularity in epileptic seizure time-series  
618 data. *IEEE Engineering in Medicine and Biology Magazine* 17(3):89–94.
- 619 48. Zhang XS, Roy RJ, Jensen EW (2001) EEG complexity as a measure of depth of anesthesia  
620 for patients. *IEEE Transactions on Biomedical Engineering* 48(12):1424–1433.
- 621 49. Mitchell M (2009) *Complexity: A Guided Tour.* (Oxford University Press).
- 622 50. Vitanyi PM, Li M (1997) *An Introduction to Kolmogorov Complexity and its Applications.*  
623 (Springer Heidelberg) Vol. 34.
- 624 51. Zenil H (2020) A review of methods for estimating algorithmic complexity: Options, chal-  
625 lenges, and new directions. *Entropy* 22(6):612.
- 626 52. Ziv J (1978) Coding theorems for individual sequences. *IEEE Transactions on Information*  
627 *Theory.*
- 628 53. Cover TM, Thomas JA (2006) *Elements of Information Theory.* (Wiley, Hoboken).
- 629 54. Feder M, Merhav N (1994) Relations between entropy and error probability. *IEEE Transac-*  
630 *tions on Information Theory* 40(1):259–266.
- 631 55. Schartner MM, et al. (2017) Global and local complexity of intracranial EEG decreases during  
632 NREM sleep. *Neuroscience of Consciousness* 2017(1).
- 633 56. Kaspar F, Schuster H (1987) Easily calculable measure for the complexity of spatiotemporal  
634 patterns. *Physical Review A* 36(2):842.
- 635 57. Bates D, Mächler M, Bolker B, Walker S (2015) Fitting linear mixed-effects models using lme4.  
636 *Journal of Statistical Software* 67(1):1–48.
- 637 58. Kuznetsova A, Brockhoff PB, Christensen RHB (2017) lmerTest package: Tests in linear  
638 mixed effects models. *Journal of Statistical Software* 82(13):1–26.
